# Supplementary material for: Long-term sediment exposure to ZnO nanoparticles induces oxidative stress in Caenorhabditis elegans
Source: Royal Society of Chemistry journal article supplement (doi:10.1039/c9en00039a), 2019-01-01

**Supplementary Information**

**EN-ART-01-2019-000039-R1**

**Long-term sediment exposure to ZnO nanoparticles induces oxidative stress in**

***Caenorhabditis elegans***

**Chi-Wei Huang, Shang-Wei Li, Vivian Hsiu-Chuan Liao\***

**Figure S1. TEM image of ZnO-NPs used in the present study.**

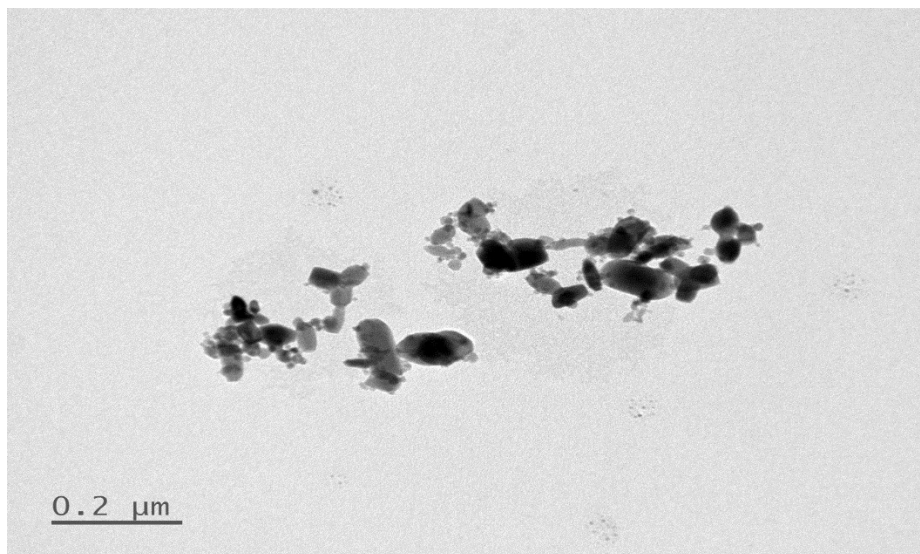

Supplement: c9en00039a1.pdf [file c9en00039a1.pdf]
